# Supplementary material for: Epidemiology of mutant Plasmodium falciparum parasites lacking histidine-rich protein 2/3 genes in Eritrea 2 years after switching from HRP2-based RDTs
Source: PubMed Central journal article supplement (PMC8548324; doi:10.1038/s41598-021-00714-8), 2021-10-26
Supplement: 41598_2021_714_MOESM1_ESM.pdf [file 41598_2021_714_MOESM1_ESM.pdf]

**Epidemiology of mutant *Plasmodium falciparum* parasites lacking histidine-rich protein 2/3 genes  
in Eritrea two years after switching from HRP2-based RDTs**

Selam Mihreteab<sup>1#</sup>, Karen Anderson<sup>2,3</sup>, Cielo Pasay<sup>2,3</sup>, David Smith<sup>2,3</sup>, Michelle L. Gatton<sup>4</sup>, Jane  
Cunningham<sup>5</sup>, Araia Berhane<sup>6</sup>, Qin Cheng<sup>2,3#</sup>

<sup>1</sup>National Malaria Control Program, Ministry of Health, Asmara, Eritrea; <sup>2</sup>The Australian Defence Force  
Malaria and Infectious Disease Institute Laboratory, QIMR Berghofer Medical Research Institute,  
Brisbane, Australia; <sup>3</sup>Drug Resistance and Diagnostics, Australian Defence Force Malaria and Infectious  
Disease Institute, Brisbane, Australia; <sup>4</sup>School of Public Health and Social Work, Queensland University  
of Technology, Brisbane, Australia; <sup>5</sup>Global Malaria Programme, World Health Organization, Geneva,  
Switzerland; <sup>6</sup>Communicable Diseases Control, Ministry of Health, Asmara, Eritrea.

**#Corresponding authors**

Selam Mihreteab, National Malaria Control Program, Ministry of Health, Asmara, Eritrea, email:  
[smuqubay@gmail.com](mailto:smuqubay@gmail.com);

Qin Cheng, Australian Defence Force Malaria and Infectious Disease Institute, Brisbane, Australia,  
email: [qin.cheng@defence.gov.au](mailto:qin.cheng@defence.gov.au)

Supplementary Figures

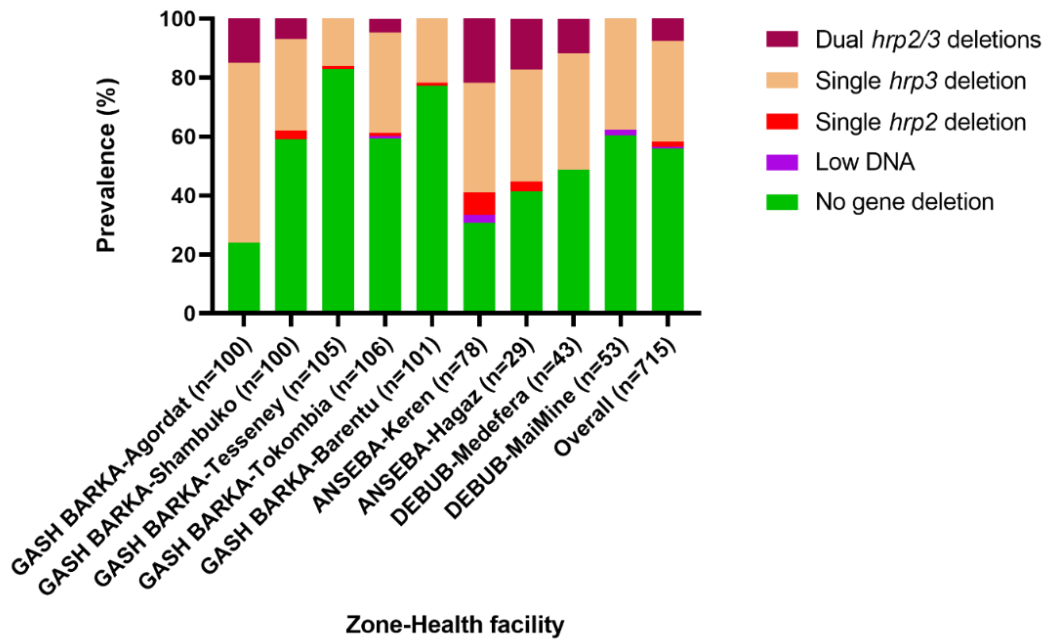

Supplementary Figure 1. Prevalence and geographical distribution of *hrp2* and *hrp3* deletions in *P. falciparum* positive samples.

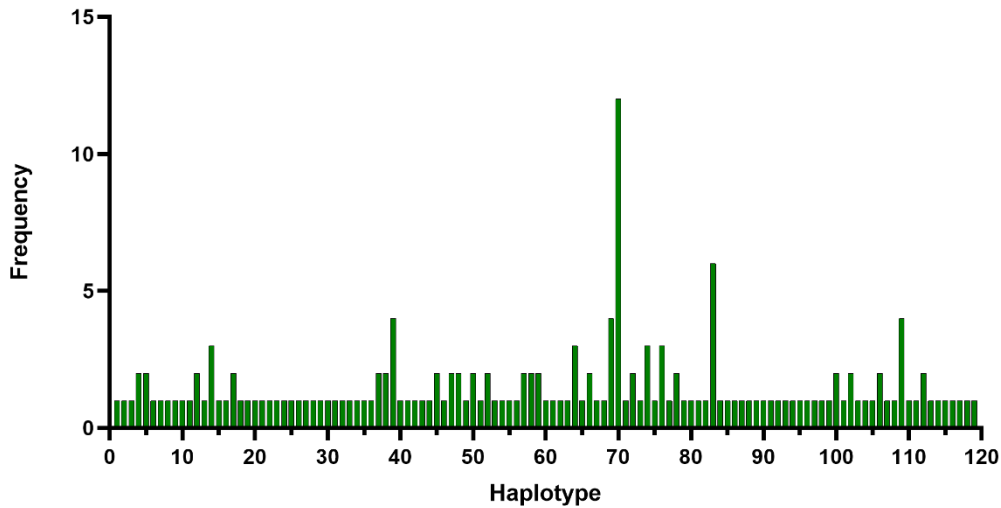

Supplementary Figure 2. Frequency of dominant haplotypes observed in 173 samples.

## Supplementary Tables

Supplementary Table 1. Number of samples examined for seven microsatellite markers and their *hrp2/3* gene status.

| Zone          | Facility*    | Number tested | Single <i>hrp2</i> deletion | Single <i>hrp3</i> deletion | Dual <i>hr2/3</i> deletion | No <i>hrp2/3</i> deletion |
|---------------|--------------|---------------|-----------------------------|-----------------------------|----------------------------|---------------------------|
| GASH<br>BARKA | Agordat HP   | 20            | 0                           | 10                          | 5                          | 5                         |
|               | Shambuko HC  | 20            | 1                           | 9                           | 4                          | 6                         |
|               | Tesseney HP  | 20            | 1                           | 11                          | 0                          | 8                         |
|               | Tokombia HC  | 20            | 5                           | 5                           | 5                          | 5                         |
|               | Barentu HP   | 20            | 1                           | 10                          | 0                          | 9                         |
| ANSEBA        | Keren HP     | 20            | 1                           | 8                           | 4                          | 7                         |
|               | Hagaz HC     | 20            | 1                           | 9                           | 5                          | 5                         |
| DEBUB         | Mendefera HP | 20            | 0                           | 9                           | 5                          | 6                         |
|               | MaiMine HC   | 20            | 0                           | 9                           | 0                          | 11                        |
| Total         |              | 180           | 10                          | 80                          | 28                         | 62                        |

\* HP: Hospital, HC: Health Centre.
